# Supplementary material for: Jag1 insufficiency alters liver fibrosis via T cell and hepatocyte differentiation defects
Source: PubMed Central journal article supplement (PMC11554675; doi:10.1038/s44321-024-00145-8), 2024-10-02
Supplement: 44321_2024_145_MOESM1_ESM.pdf [file 44321_2024_145_MOESM1_ESM.pdf]

## **Jag1 Insufficiency Alters Liver Fibrosis via T Cell and Hepatocyte Differentiation Defects**

Jan Mašek<sup>1,2,3\*</sup>, Iva Filipovic<sup>4</sup>, Noémi Van Hul<sup>1</sup>, Lenka Belicová<sup>1</sup>, Markéta Jiroušková<sup>5#</sup>, Daniel V. Oliveira<sup>2#</sup>, Anna Maria Frontino<sup>2#</sup>, Simona Hankeova<sup>1#</sup>, Jingyan He<sup>1#</sup>, Fabio Turetti<sup>2</sup>, Afshan Iqbal<sup>1</sup>, Igor Červenka<sup>1</sup>, Lenka Sarnová<sup>5</sup>, Elisabeth Verboven<sup>1</sup>, Tomáš Brabec<sup>2</sup>, Niklas K. Björkström<sup>4</sup>, Martin Gregor<sup>5</sup>, Jan Dobeš<sup>2</sup>, Emma R. Andersson<sup>1,3\*</sup>

<sup>#</sup> equal contribution

Corresponding authors' contact information: \* correspondence to [jan.masek@natur.cuni.cz](mailto:jan.masek@natur.cuni.cz) and/or [emma.andersson@ki.se](mailto:emma.andersson@ki.se)

### Affiliation:

<sup>1</sup> Department of Cell and Molecular Biology, Karolinska Institute, Stockholm, SE-171 77 Solna, Sweden.

<sup>2</sup> Department of Cell Biology, Faculty of Science, Charles University, Viničná 7, 128 00 Prague 2, Czech Republic.

<sup>3</sup> Department of Biosciences and Nutrition, Karolinska Institute, Huddinge 14183, Sweden

<sup>4</sup> Center for Infectious Medicine, Department of Medicine Huddinge, Karolinska Institutet, Karolinska University Hospital, Stockholm, Sweden

<sup>5</sup> Laboratory of Integrative Biology, Institute of Molecular Genetics of the Czech Academy of Sciences, Vídeňská 1083, Prague, Czech Republic.

### **Appendix Figures:**

**Appendix Figure S1**, page 2

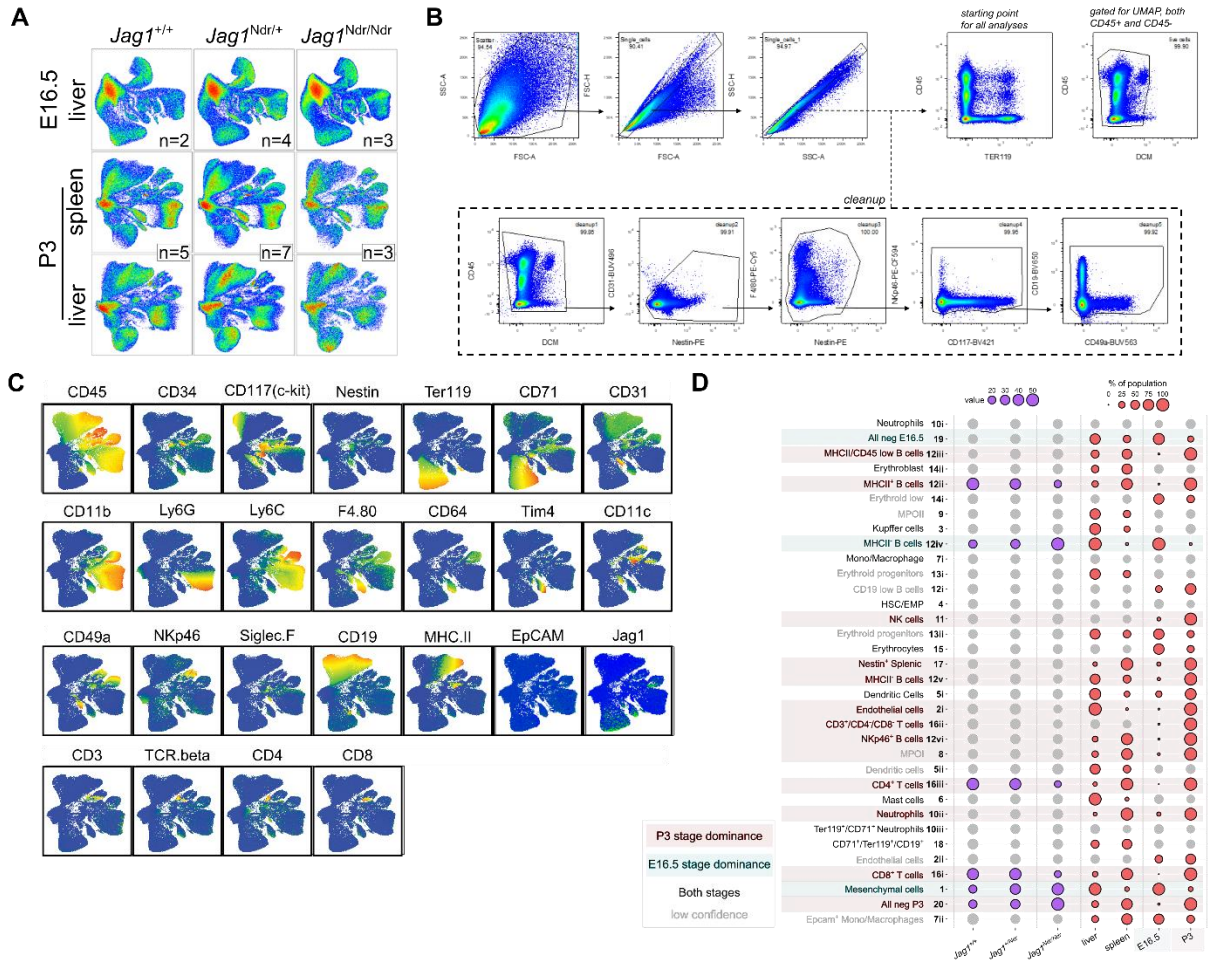

**Appendix Figure S1: 25-colour Flow cytometry profiling of embryonic and postnatal liver and spleen reveals enrichment of B cells and depletion of T-cell populations in *Jag1<sup>Ndr/Ndr</sup>* mice.** (A) Genotype, stage, or organ contribution to the composition of the Flow cytometry spleen and/or liver samples from E16.5 and P3 *Jag1<sup>+/+</sup>*, *Jag1<sup>Ndr/+</sup>*, and *Jag1<sup>Ndr/Ndr</sup>* mice. (B) Flow cytometry gating strategy. (C) UMAP projections of the cells expressing marker proteins across the aggregated 25-colour Flow cytometry dataset of 194,999 cells sampled from E16.5 and P3 livers, and P3 spleens of *Jag1<sup>+/+</sup>* (n=7 biological replicates), *Jag1<sup>Ndr/+</sup>* (n=11 biological replicates), and *Jag1<sup>Ndr/Ndr</sup>* (n=6 biological replicates) mice (D) Dot plot depicting relative frequencies of the identified cell populations across genotypes, tissues, and developmental stages. MPO, myeloid progenitors; HSC, haematopoietic stem cells; EMP, erythroid-myeloid progenitor.
